# Supplementary material for: Identification of SARS-CoV-2 Main Protease Inhibitors from a Library of Minor Cannabinoids by Biochemical Inhibition Assay and Surface Plasmon Resonance Characterized Binding Affinity
Source: MDPI journal article supplement (doi:10.3390/molecules27186127), 2022-09-19
Supplement: s1 [file s1]

## **SUPPLEMENTARY MATERIALS**

### **Identification of SARS-CoV-2 Main Protease Inhibitors from a Library of Minor Cannabinoids by Biochemical Inhibition Assay and Surface Plasmon Resonance Characterized Binding Affinity**

Chang Liu, Tess Puopolo, Huifang Li, Ang Cai, Navindra P. Seeram\*, Hang Ma\*

Department of Biomedical and Pharmaceutical Sciences, College of  
Pharmacy, University of Rhode Island, Kingston, RI 02881, USA

#### **\*Correspondence:**

Navindra P. Seeram, Phone: +1(401)-874-9367; Email: [nseeram@uri.edu](mailto:nseeram@uri.edu)

Hang Ma, Phone: +1(401)-874-7654; Email: [hang\\_ma@uri.edu](mailto:hang_ma@uri.edu)

Address: 7 Greenhouse Rd, Kingston, RI 02881, USA

Department of Biomedical and Pharmaceutical Sciences, College of Pharmacy, University  
of Rhode Island

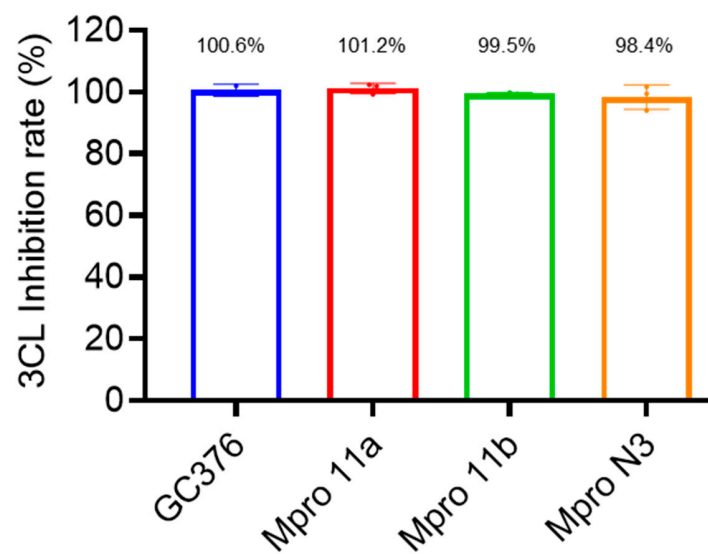

**Figure S1.** The M<sup>pro</sup> inhibitory effects of known inhibitors of SARS-CoV-2 M<sup>pro</sup>. Including GC376, Mpro 11a, Mpro 11b, and Mpro N3 at a concentration of 10  $\mu$ M.
